# Supplementary material for: The long noncoding RNA Meg3 mediates TLR4-induced inflammation in experimental obstructive nephropathy
Source: Oxford University Press journal article supplement (doi:10.1042/cs20220537), 2023-01-27
Supplement: cs-2022-0537_supp.pdf [file cs-2022-0537_supp.pdf]

**A**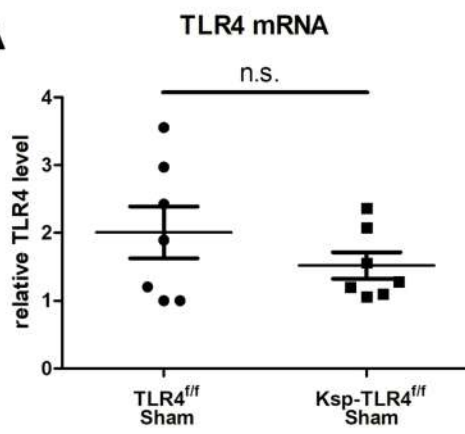**B**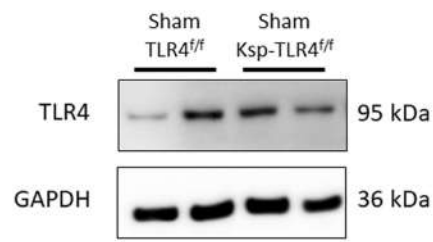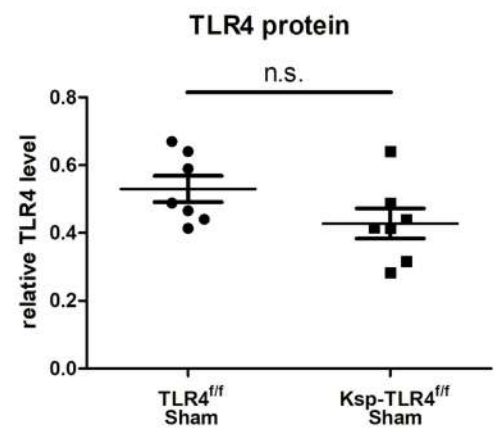

**Figure S1. Renal TLR4 expression in tubule-specific TLR4 knockout mice under normal physiologic conditions** (A) Real-time analysis of TLR4 mRNA expression in TLR4<sup>f/f</sup> sham mice and Ksp-TLR4<sup>f/f</sup> sham mice. (B) TLR4 protein expression as determined by Western blot analysis. (n=7 in each group)
